# Supplementary material
Source: PubMed Central journal article supplement (PMC6751798)

## Supplementary Online Content

Frye MA, Coombes BJ, McElroy SL, et al. Association of cytomegalovirus and *Toxoplasma gondii* antibody titers with bipolar disorder. *JAMA Psychiatry*. Published online September 18, 2019. doi:10.1001/jamapsychiatry.2019.2499

**eTable 1.** Case-control Analyses.

**eTable 2.** CRP analysis

**eTable 3.** TATA+ Sensitivity Analysis Results

**eFigure.** Distributions of Each Serology Measurement.

This supplementary material has been provided by the authors to give readers additional information about their work.

**eTable 1. Case-control analyses**

Results for each case-control analysis using either logistic regression using seropositive status as the outcome (CMV IgG, Toxo IgG, and CMV+ & Toxo-) or linear regression using z-score or log-transformed z-score as the outcome (CMV IgM, Toxo IgM, and Measles IgG). Standard error (SE) is for either log(OR) or the estimates (Est).

| Control comparison     | Outcome      | All Cases |        |        |      |        | Matched Analysis |        |        |      |        |
|------------------------|--------------|-----------|--------|--------|------|--------|------------------|--------|--------|------|--------|
|                        |              | # Control | # Case | OR/Est | SE   | p      | # Control        | # Case | OR/Est | SE   | p      |
| <b>BD</b>              | CMV IgG      | 745       | 1207   | 1.24   | 0.10 | 0.0296 | 745              | 746    | 1.22   | 0.11 | 0.0708 |
|                        | Toxo IgG     |           |        | 0.69   | 0.15 | 0.0115 |                  |        | 0.71   | 0.17 | 0.0401 |
|                        | CMV+ & Toxo- |           |        | 1.33   | 0.10 | 0.0044 |                  |        | 1.31   | 0.11 | 0.0140 |
|                        | CMV IgM      |           |        | -0.03  | 0.02 | 0.0883 |                  |        | -0.02  | 0.02 | 0.2793 |
|                        | Toxo IgM     |           |        | -0.06  | 0.02 | 0.0019 |                  |        | -0.06  | 0.02 | 0.0054 |
|                        | Measles IgG  |           |        | 0.09   | 0.04 | 0.0463 |                  |        | 0.06   | 0.05 | 0.2496 |
| <b>BD-I</b>            | CMV IgG      | 745       | 823    | 1.33   | 0.11 | 0.0064 | 474              | 475    | 1.21   | 0.13 | 0.1576 |
|                        | Toxo IgG     |           |        | 0.73   | 0.16 | 0.0491 |                  |        | 0.78   | 0.20 | 0.2364 |
|                        | CMV+ & Toxo- |           |        | 1.41   | 0.11 | 0.0014 |                  |        | 1.28   | 0.14 | 0.0725 |
|                        | CMV IgM      |           |        | -0.02  | 0.02 | 0.3349 |                  |        | 0.01   | 0.02 | 0.8251 |
|                        | Toxo IgM     |           |        | -0.05  | 0.02 | 0.0129 |                  |        | -0.05  | 0.03 | 0.0748 |
|                        | Measles IgG  |           |        | 0.12   | 0.05 | 0.0150 |                  |        | 0.14   | 0.06 | 0.0227 |
| <b>BD-II</b>           | CMV IgG      | 745       | 364    | 1.00   | 0.13 | 0.9714 | 267              | 267    | 1.20   | 0.18 | 0.3272 |
|                        | Toxo IgG     |           |        | 0.60   | 0.22 | 0.0210 |                  |        | 0.59   | 0.29 | 0.0717 |
|                        | CMV+ & Toxo- |           |        | 1.13   | 0.14 | 0.3871 |                  |        | 1.35   | 0.19 | 0.1173 |
|                        | CMV IgM      |           |        | -0.05  | 0.02 | 0.0215 |                  |        | -0.07  | 0.03 | 0.0357 |
|                        | Toxo IgM     |           |        | -0.07  | 0.03 | 0.0114 |                  |        | -0.09  | 0.04 | 0.0159 |
|                        | Measles IgG  |           |        | 0.02   | 0.06 | 0.7309 |                  |        | -0.09  | 0.08 | 0.2512 |
| <b>Manic Psychosis</b> | CMV IgG      | 745       | 401    | 1.34   | 0.13 | 0.0234 | 251              | 251    | 1.41   | 0.19 | 0.0653 |
|                        | Toxo IgG     |           |        | 0.74   | 0.20 | 0.1347 |                  |        | 0.94   | 0.29 | 0.8247 |

|                           |                |                  |               |               |           |          |                  |               |               |           |          |
|---------------------------|----------------|------------------|---------------|---------------|-----------|----------|------------------|---------------|---------------|-----------|----------|
|                           | CMV+ & Toxo-   |                  |               | 1.46          | 0.13      | 0.0035   |                  |               | 1.58          | 0.19      | 0.0164   |
|                           | CMV IgM        |                  |               | -0.04         | 0.02      | 0.0834   |                  |               | -0.02         | 0.03      | 0.6066   |
|                           | Toxo IgM       |                  |               | -0.05         | 0.02      | 0.0286   |                  |               | -0.01         | 0.03      | 0.6981   |
|                           | Measles IgG    |                  |               | 0.15          | 0.06      | 0.0107   |                  |               | 0.18          | 0.08      | 0.0319   |
| <b>Control comparison</b> | <b>Outcome</b> | <b># Control</b> | <b># Case</b> | <b>OR/Est</b> | <b>SE</b> | <b>p</b> | <b># Control</b> | <b># Case</b> | <b>OR/Est</b> | <b>SE</b> | <b>p</b> |
| <b>No</b>                 | CMV IgG        | 745              | 681           | 1.19          | 0.11      | 0.1218   | 419              | 420           | 1.17          | 0.14      | 0.2714   |
| <b>Psychosis</b>          | Toxo IgG       |                  |               | 0.65          | 0.17      | 0.0135   |                  |               | 0.59          | 0.22      | 0.0156   |
|                           | CMV+ & Toxo-   |                  |               | 1.26          | 0.11      | 0.0394   |                  |               | 1.24          | 0.15      | 0.1410   |
|                           | CMV IgM        |                  |               | -0.03         | 0.02      | 0.1376   |                  |               | -0.01         | 0.03      | 0.7353   |
|                           | Toxo IgM       |                  |               | -0.05         | 0.02      | 0.0267   |                  |               | -0.06         | 0.03      | 0.0272   |
|                           | Measles IgG    |                  |               | 0.07          | 0.05      | 0.1668   |                  |               | -0.01         | 0.06      | 0.8950   |
| <b>Early Onset</b>        | CMV IgG        | 745              | 237           | 1.11          | 0.17      | 0.5129   | 132              | 132           | 0.65          | 0.26      | 0.0994   |
|                           | Toxo IgG       |                  |               | 0.79          | 0.27      | 0.3924   |                  |               | 0.71          | 0.43      | 0.4311   |
|                           | CMV+ & Toxo-   |                  |               | 1.19          | 0.17      | 0.2960   |                  |               | 0.82          | 0.27      | 0.4575   |
|                           | CMV IgM        |                  |               | 0.00          | 0.03      | 0.9348   |                  |               | 0.00          | 0.05      | 0.9987   |
|                           | Toxo IgM       |                  |               | -0.04         | 0.03      | 0.1759   |                  |               | -0.04         | 0.05      | 0.4121   |
|                           | Measles IgG    |                  |               | 0.10          | 0.07      | 0.1833   |                  |               | -0.01         | 0.12      | 0.9292   |
| <b>Non-early Onset</b>    | CMV IgG        | 745              | 911           | 1.29          | 0.10      | 0.0134   | 565              | 566           | 1.38          | 0.12      | 0.0096   |
|                           | Toxo IgG       |                  |               | 0.63          | 0.16      | 0.0033   |                  |               | 0.66          | 0.19      | 0.0266   |
|                           | CMV+ & Toxo-   |                  |               | 1.41          | 0.10      | 0.0010   |                  |               | 1.45          | 0.13      | 0.0031   |
|                           | CMV IgM        |                  |               | -0.04         | 0.02      | 0.0329   |                  |               | -0.03         | 0.02      | 0.1506   |
|                           | Toxo IgM       |                  |               | -0.06         | 0.02      | 0.0045   |                  |               | -0.07         | 0.02      | 0.0065   |
|                           | Measles IgG    |                  |               | 0.08          | 0.05      | 0.0982   |                  |               | 0.08          | 0.05      | 0.1485   |

## eTable 2. CRP Analysis

Matched analysis (Minnesota only) of CRP Adjusted for either BMI or both BMI and current smoking status. Each of the case groups are compared against controls. Standard error (SE) is for either log(OR) or the estimates (Est).

| Covariates<br>in the model: | Sex, education, age |       |       |      |          | Sex, education, age,<br>+ BMI |       |       |      |        | Sex, education, age,<br>+ BMI and smoking |       |       |      |          |
|-----------------------------|---------------------|-------|-------|------|----------|-------------------------------|-------|-------|------|--------|-------------------------------------------|-------|-------|------|----------|
|                             | Ctrls               | Cases | Est   | SE   | <i>p</i> | Ctrls                         | Cases | Est   | SE   | P      | Ctrls                                     | Cases | Est   | SE   | <i>p</i> |
| BD                          | 745                 | 746   | 0.08  | 0.05 | 0.1389   | 704                           | 697   | 0.03  | 0.05 | 0.5714 | 704                                       | 697   | 0.02  | 0.05 | 0.7263   |
| BD-I                        | 474                 | 475   | 0.08  | 0.06 | 0.2114   | 444                           | 443   | 0.06  | 0.06 | 0.2784 | 444                                       | 443   | 0.05  | 0.06 | 0.3652   |
| BD-II                       | 257                 | 257   | 0.04  | 0.09 | 0.6755   | 247                           | 242   | -0.08 | 0.08 | 0.3589 | 247                                       | 242   | -0.08 | 0.08 | 0.3297   |
| Early onset BD              | 132                 | 132   | -0.09 | 0.13 | 0.4582   | 122                           | 124   | -0.10 | 0.12 | 0.3942 | 122                                       | 124   | -0.11 | 0.12 | 0.3740   |
| Non-early onset BD          | 565                 | 566   | 0.12  | 0.06 | 0.0309   | 535                           | 529   | 0.07  | 0.05 | 0.2072 | 535                                       | 529   | 0.06  | 0.05 | 0.2797   |
| Manic psychosis             | 251                 | 251   | 0.20  | 0.09 | 0.0243   | 233                           | 236   | 0.11  | 0.08 | 0.1729 | 233                                       | 236   | 0.09  | 0.08 | 0.2721   |
| No psychosis                | 419                 | 420   | 0.01  | 0.07 | 0.9398   | 398                           | 393   | -0.03 | 0.06 | 0.6348 | 398                                       | 393   | -0.04 | 0.07 | 0.5582   |

### eTable 3. TATA+ Sensitivity Analysis Results

The non-TATA+ analysis results were provided for all Toxo-related results. Due to the potential effect TATA+ medications can have on Toxo measurements, we restrict these analyses to cases who are not taking TATA+ medications so that we can remove any potential confounding.

|                            | <b>Outcome</b> | <b># Control</b> | <b># Case</b> | <b>OR/Est</b> | <b>SE</b> | <b>p</b> |
|----------------------------|----------------|------------------|---------------|---------------|-----------|----------|
| <b>BD</b>                  | Toxo IgG       | 745              | 935           | 0.63          | 0.10      | 0.004    |
|                            | CMV+/Toxo-     |                  |               | 1.45          | 0.16      | 0.0004   |
|                            | Toxo IgM       |                  |               | -0.05         | 0.10      | 0.018    |
| <b>BD-I</b>                | Toxo IgG       | 745              | 823           | 1.48          | 0.11      | 0.0005   |
|                            | CMV+/Toxo-     |                  |               | 0.72          | 0.18      | 0.0587   |
|                            | Toxo IgM       |                  |               | 0.45          | 0.11      | 0.0001   |
| <b>BD-II</b>               | Toxo IgG       | 745              | 364           | 0.96          | 0.14      | 0.7841   |
|                            | CMV+/Toxo-     |                  |               | 0.43          | 0.26      | 0.0013   |
|                            | Toxo IgM       |                  |               | 0.12          | 0.14      | 0.3920   |
| <b>Manic<br/>Psychosis</b> | Toxo IgG       | 745              | 401           | 1.47          | 0.14      | 0.0069   |
|                            | CMV+/Toxo-     |                  |               | 0.71          | 0.23      | 0.1385   |
|                            | Toxo IgM       |                  |               | 0.49          | 0.14      | 0.0006   |
| <b>No<br/>Psychosis</b>    | Toxo IgG       | 745              | 681           | 1.24          | 0.12      | 0.0675   |
|                            | CMV+/Toxo-     |                  |               | 0.55          | 0.19      | 0.0023   |
|                            | Toxo IgM       |                  |               | 0.30          | 0.12      | 0.0118   |
| <b>Early<br/>Onset</b>     | Toxo IgG       | 745              | 237           | 1.11          | 0.19      | 0.5571   |
|                            | CMV+/Toxo-     |                  |               | 0.86          | 0.31      | 0.6134   |
|                            | Toxo IgM       |                  |               | 0.18          | 0.19      | 0.3186   |
| <b>Non-early<br/>Onset</b> | Toxo IgG       | 745              | 911           | 1.38          | 0.11      | 0.0026   |
|                            | CMV+/Toxo-     |                  |               | 0.55          | 0.18      | 0.0006   |
|                            | Toxo IgM       |                  |               | 0.43          | 0.11      | 0.0001   |

### eFigure. Distributions of Each Serology Measurement

Histograms of each serology measurement. Distribution of seropositive/seronegative dichotomization shown in right corner for CMV IgG and Toxo IgG.

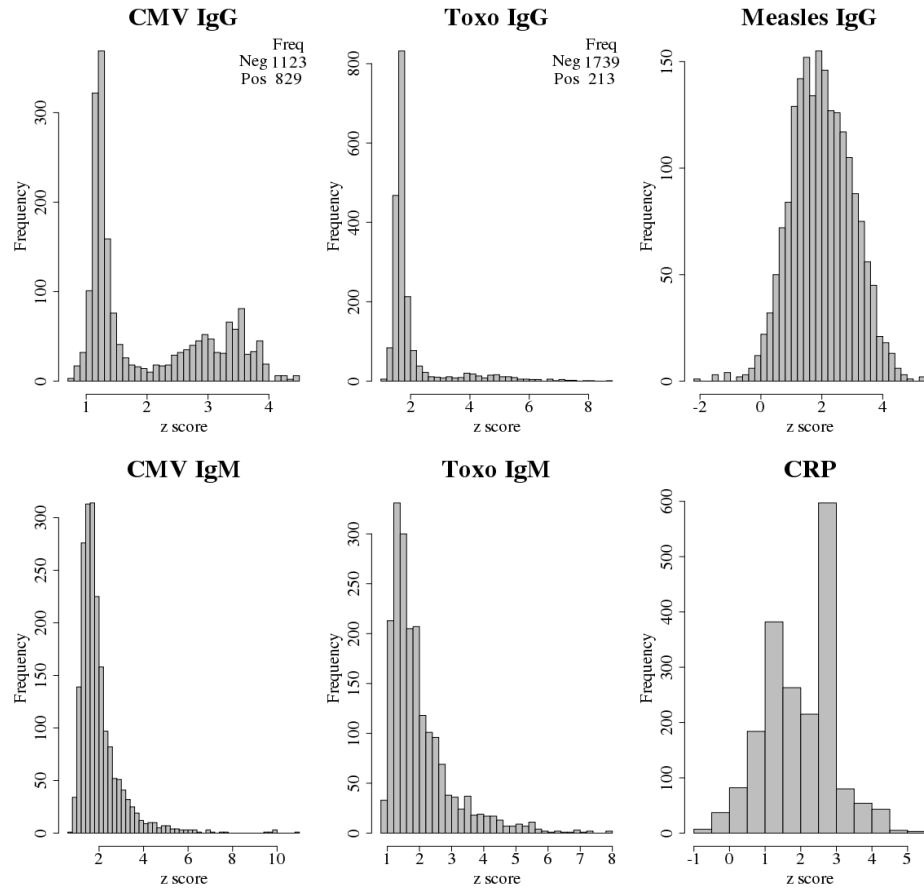

Supplement: jamapsychiatry-76-1285-s001.pdf [file jamapsychiatry-76-1285-s001.pdf]
